# Supplementary material for: Decline in Other Instrumental Activities of Daily Living as Indicators of Driving Risk in Older Adults at an Academic Memory Clinic
Source: MDPI journal article supplement (doi:10.3390/geriatrics8010007), 2023-01-05
Supplement: s1 [file s1]

## Supplementary Materials

**Supplemental Table S1: Summary of 3MS sub-scores by referral status**

| 3MS Sub-scores          | Referred drivers |           | Non-referred drivers |           | p-value |
|-------------------------|------------------|-----------|----------------------|-----------|---------|
|                         | mean $\pm$ SD    | N Missing | mean $\pm$ SD        | N Missing |         |
| Birth date and location | 4.8 (0.6)        | 0         | 5.0 (0.1)            | 0         | 0.12    |
| Registration            | 2.8 (0.7)        | 0         | 3.0 (0.0)            | 0         | 0.05    |
| Mental reversal         | 6.0 (1.6)        | 0         | 6.7 (1.0)            | 0         | 0.01    |
| Immediate recall        | 3.9 (2.6)        | 0         | 6.1 (2.3)            | 0         | <0.05   |
| Temporal orientation    | 11.4 (4.7)       | 0         | 14.4 (1.9)           | 0         | <0.05   |
| Spatial orientation     | 4.9 (0.3)        | 1         | 5.0 (0.1)            | 0         | 0.09    |
| Naming                  | 4.7 (0.8)        | 1         | 4.9 (0.3)            | 0         | 0.02    |
| Fluency                 | 7.1 (2.1)        | 0         | 8.6 (1.9)            | 0         | <0.05   |
| Abstraction             | 3.1 (1.8)        | 3         | 4.8 (1.4)            | 0         | <0.05   |
| Repetition              | 4.8 (0.7)        | 1         | 4.9 (0.4)            | 0         | 0.35    |
| Read and obey           | 2.9 (0.4)        | 2         | 3.0 (0.0)            | 0         | 0.06    |
| Writing                 | 4.8 (0.4)        | 2         | 5.0 (0.0)            | 0         | <0.05   |
| Copying pentagons       | 8.7 (1.4)        | 2         | 9.4 (0.7)            | 0         | <0.05   |
| 3 stage command         | 2.8 (0.4)        | 6         | 2.9 (0.3)            | 0         | 0.45    |
| Delayed recall          | 4.8 (2.8)        | 0         | 7.5 (2.1)            | 0         | <0.05   |

**Supplemental Table S2: Predicted probabilities of being referred to driving authority by number of instrumental activities of daily living (iADL) domains showing decline**

| Clinical Risk factor        | Referred drivers |      |     |     |     |           |           |           | Non-referred drivers |      |     |     |     |           |           |           |
|-----------------------------|------------------|------|-----|-----|-----|-----------|-----------|-----------|----------------------|------|-----|-----|-----|-----------|-----------|-----------|
|                             | N                | Mean | SD  | Min | Max | 25th Pctl | 50th Pctl | 75th Pctl | N                    | Mean | SD  | Min | Max | 25th Pctl | 50th Pctl | 75th Pctl |
| iADL Functional impairments |                  |      |     |     |     |           |           |           |                      |      |     |     |     |           |           |           |
| 0 to 1                      | 18               | 0.37 | 0.2 | 0.1 | 0.6 | 0.2       | 0.4       | 0.5       | 37                   | 0.28 | 0.1 | 0.0 | 0.6 | 0.2       | 0.3       | 0.4       |
| 2                           | 11               | 0.66 | 0.1 | 0.4 | 0.8 | 0.6       | 0.7       | 0.8       | 10                   | 0.55 | 0.2 | 0.1 | 0.8 | 0.4       | 0.6       | 0.7       |
| 3                           | 12               | 0.87 | 0.1 | 0.7 | 0.9 | 0.8       | 0.9       | 0.9       | 3                    | 0.69 | 0.1 | 0.6 | 0.7 | 0.6       | 0.7       | 0.7       |
| 4                           | 9                | 0.86 | 0.1 | 0.7 | 1.0 | 0.8       | 0.9       | 0.9       |                      |      |     |     |     |           |           |           |

**Supplement Table S3: Baseline characteristics by referral status and number of instrumental activities of daily living (iADL) domains showing decline**

|                                      | Referred drivers<br>(N=50)        |                  | Non-referred drivers<br>(N=50)    |                  |
|--------------------------------------|-----------------------------------|------------------|-----------------------------------|------------------|
|                                      | <i>Number of iADL impairments</i> |                  | <i>Number of iADL impairments</i> |                  |
|                                      | 0 to 1<br>(N=18)                  | 2 to 4<br>(N=32) | 0 to 1<br>(N=37)                  | 2 to 4<br>(N=13) |
| Age (years), mean $\pm$ SD           | 76.8 $\pm$ 8.4                    | 78.9 $\pm$ 5.3   | 72.9 $\pm$ 7.0                    | 72.9 $\pm$ 7.0   |
| Sex, n (%)                           |                                   |                  |                                   |                  |
| Male                                 | 15 (83.3)                         | 16 (50.0)        | 16 (43.2)                         | 9 (69.2)         |
| Female                               | 3 (16.7)                          | 16 (50.0)        | 21 (56.8)                         | 4 (30.8)         |
| Education, n (%)                     |                                   |                  |                                   |                  |
| High school or lower                 | 6 (33.3)                          | 17 (53.1)        | 11 (29.7)                         | 3 (23.1)         |
| College or university                | 12 (66.7)                         | 15 (46.9)        | 26 (70.3)                         | 10 (76.9)        |
| First language, n (%)                |                                   |                  |                                   |                  |
| English                              | 8 (44.4)                          | 17 (53.1)        | 13 (35.1)                         | 4 (30.8)         |
| French                               | 10 (55.6)                         | 15 (46.9)        | 22 (59.5)                         | 8 (61.5)         |
| Other                                | 0 (0.0)                           | 0 (0.0)          | 2 (5.4)                           | 1 (7.7)          |
| Living status, n (%)                 |                                   |                  |                                   |                  |
| With others                          | 15 (83.3)                         | 24 (75.0)        | 32 (86.5)                         | 12 (92.3)        |
| Alone                                | 3 (16.7)                          | 8 (25.0)         | 5 (13.5)                          | 1 (7.7)          |
| Cardiovascular disease, n (%)        |                                   |                  |                                   |                  |
| Yes                                  | 15 (83.3)                         | 23 (71.9)        | 28 (75.7)                         | 13 (100)         |
| No                                   | 3 (16.7)                          | 9 (28.1)         | 9 (24.3)                          | 0 (0.0)          |
| Psychiatric disease, n (%)           |                                   |                  |                                   |                  |
| Yes                                  | 7 (38.9)                          | 11 (34.4)        | 12 (32.4)                         | 5 (38.5)         |
| No                                   | 11 (61.1)                         | 21 (65.6)        | 25 (67.6)                         | 8 (61.5)         |
| Number of medications, mean $\pm$ SD | 4.2 $\pm$ 2.9                     | 4.4 $\pm$ 2.7    | 3.9 $\pm$ 2.5                     | 4.8 $\pm$ 1.7    |

**Supplement Table S4: Description of clinical risk factors for driving by referral status and number of instrumental activities of daily living (iADL) domains showing decline**

|                                        | Referred drivers<br>(N=50)        |                  |           | Non-referred drivers<br>(N=50)    |                  |           |
|----------------------------------------|-----------------------------------|------------------|-----------|-----------------------------------|------------------|-----------|
|                                        | <i>Number of iADL impairments</i> |                  |           | <i>Number of iADL impairments</i> |                  |           |
|                                        | 0 to 1<br>(N=18)                  | 2 to 4<br>(N=32) | N Missing | 0 to 1<br>(N=37)                  | 2 to 4<br>(N=13) | N Missing |
| Trails B test (seconds), mean $\pm$ SD | 263.3 $\pm$ 54.7                  | 219.8 $\pm$ 85.2 | 3         | 125.8 $\pm$ 49.0                  | 102.7 $\pm$ 27.7 | 1         |
| Trails B score categories, n (%)       |                                   |                  |           |                                   |                  |           |
| Below 3 minutes                        | 3 (16.7)                          | 11 (37.9)        | 3         | 33 (91.7)                         | 13 (100)         | 1         |
| 3 minutes or above                     | 15 (83.3)                         | 18 (62.1)        |           | 3 (8.3)                           | 0 (0.0)          |           |
| 3MS Total score, mean $\pm$ SD         | 83.7 $\pm$ 9.6                    | 71.6 $\pm$ 16.7  | 0         | 91.8 $\pm$ 7.1                    | 89.4 $\pm$ 9.3   | 0         |
| Clock drawing score categories, n (%)  |                                   |                  |           |                                   |                  |           |
| Score 1-2                              | 11 (61.1)                         | 15 (48.4)        | 1         | 35 (94.6)                         | 11 (84.6)        | 0         |
| Score 3-4                              | 7 (38.9)                          | 16 (51.6)        |           | 2 (5.4)                           | 2 (15.4)         |           |
